# Supplementary material
Source: Springer Nature journal article supplement (https://www.springermedizin.de/resource/supplementary/12967_2010_660_MOESM7_ESM.pdf/9577230)

**A**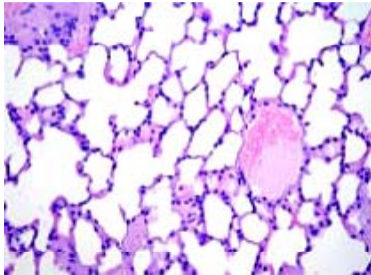**B**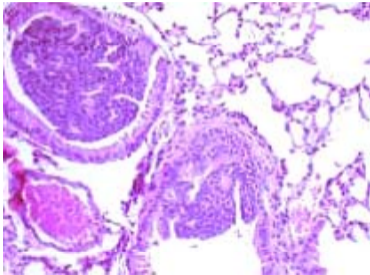**C**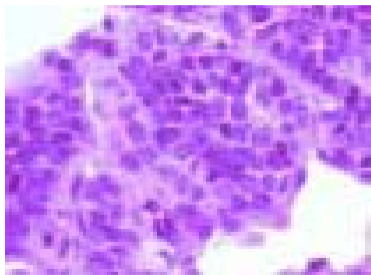

Supplement: MOESM7 [file 9577230]
